# Supplementary material
Source: Springer Nature journal article supplement (https://www.springermedizin.de/resource/supplementary/12916_2009_243_MOESM10_ESM.pdf/9599474)

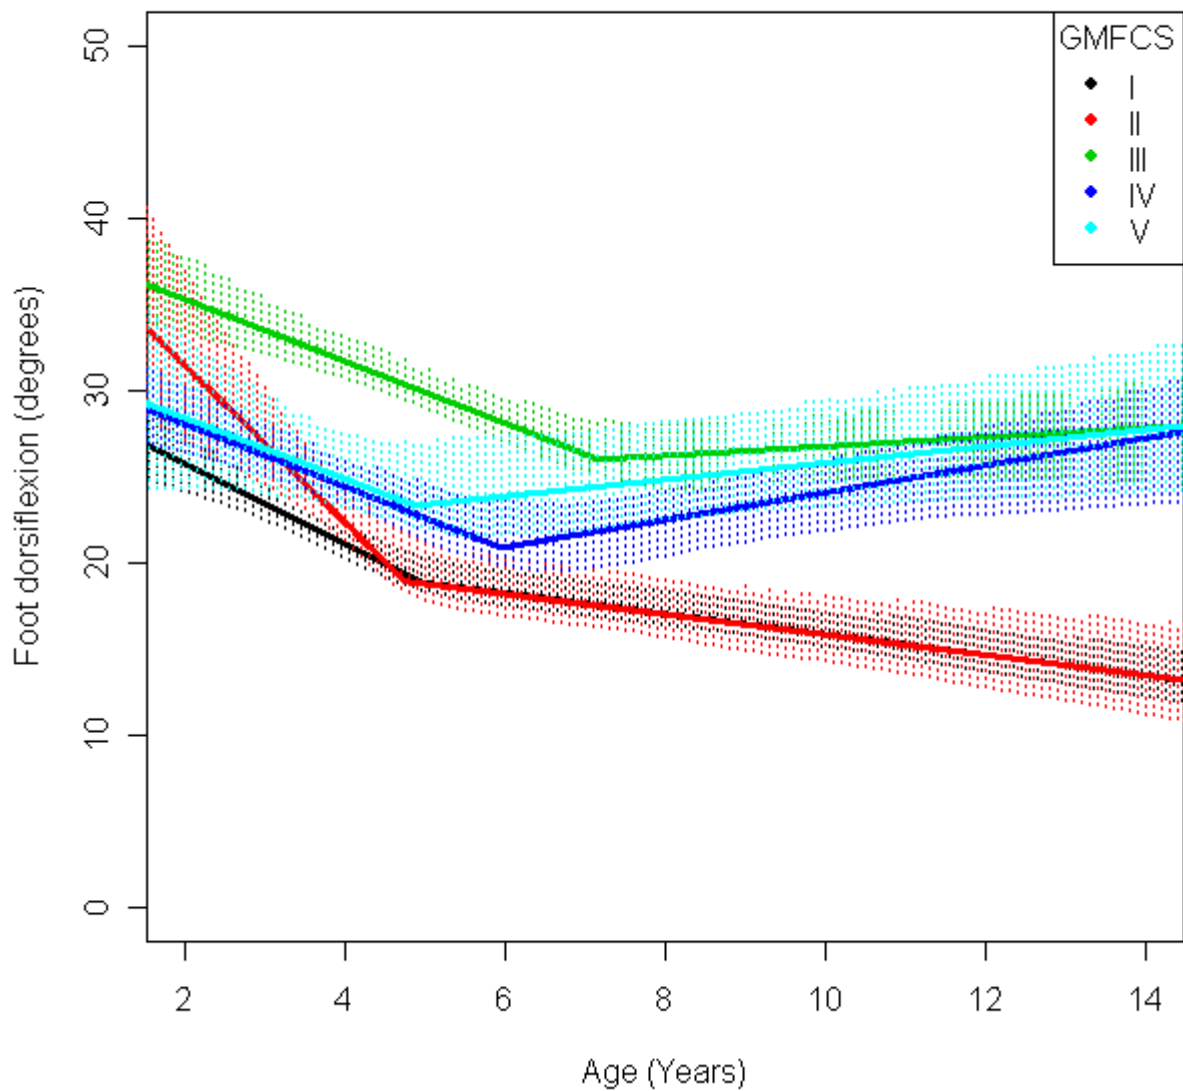

Supplement: MOESM10 [file 9599474]
